# Supplementary figures and images for: Characterization of A-to-I Editing in Pigs under a Long-Term High-Energy Diet
Source: MDPI journal article supplement (doi:10.3390/ijms24097921), 2023-04-27

**a**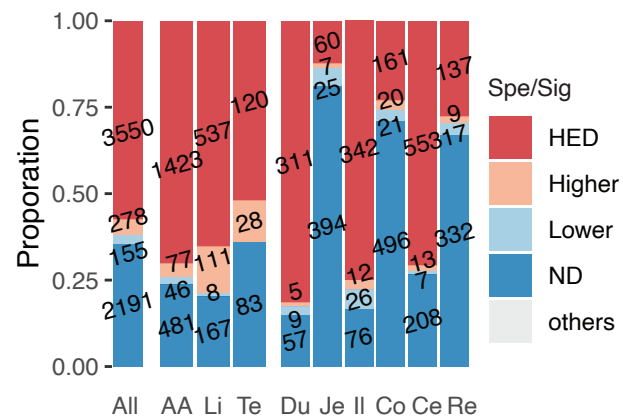**b**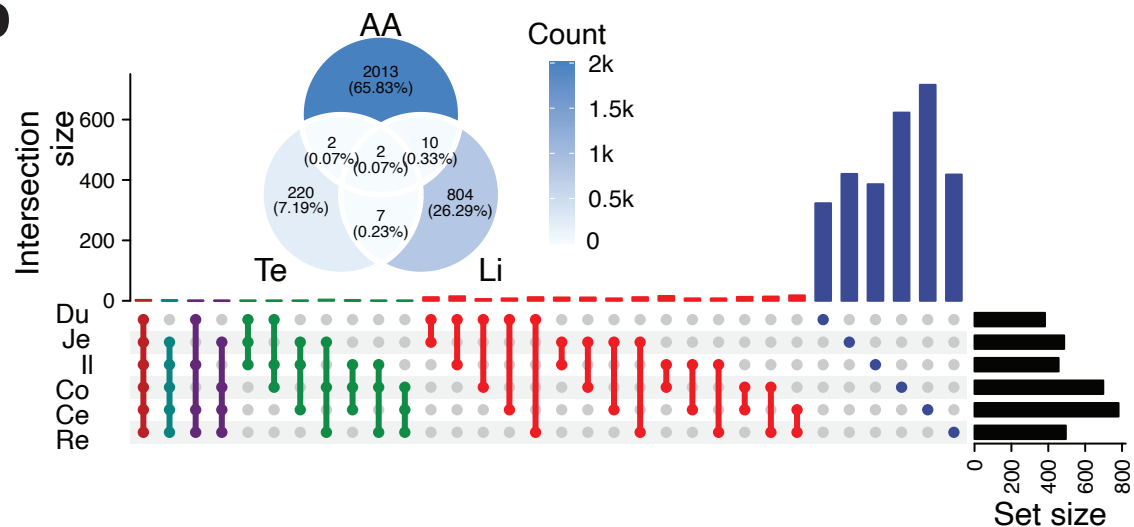**c**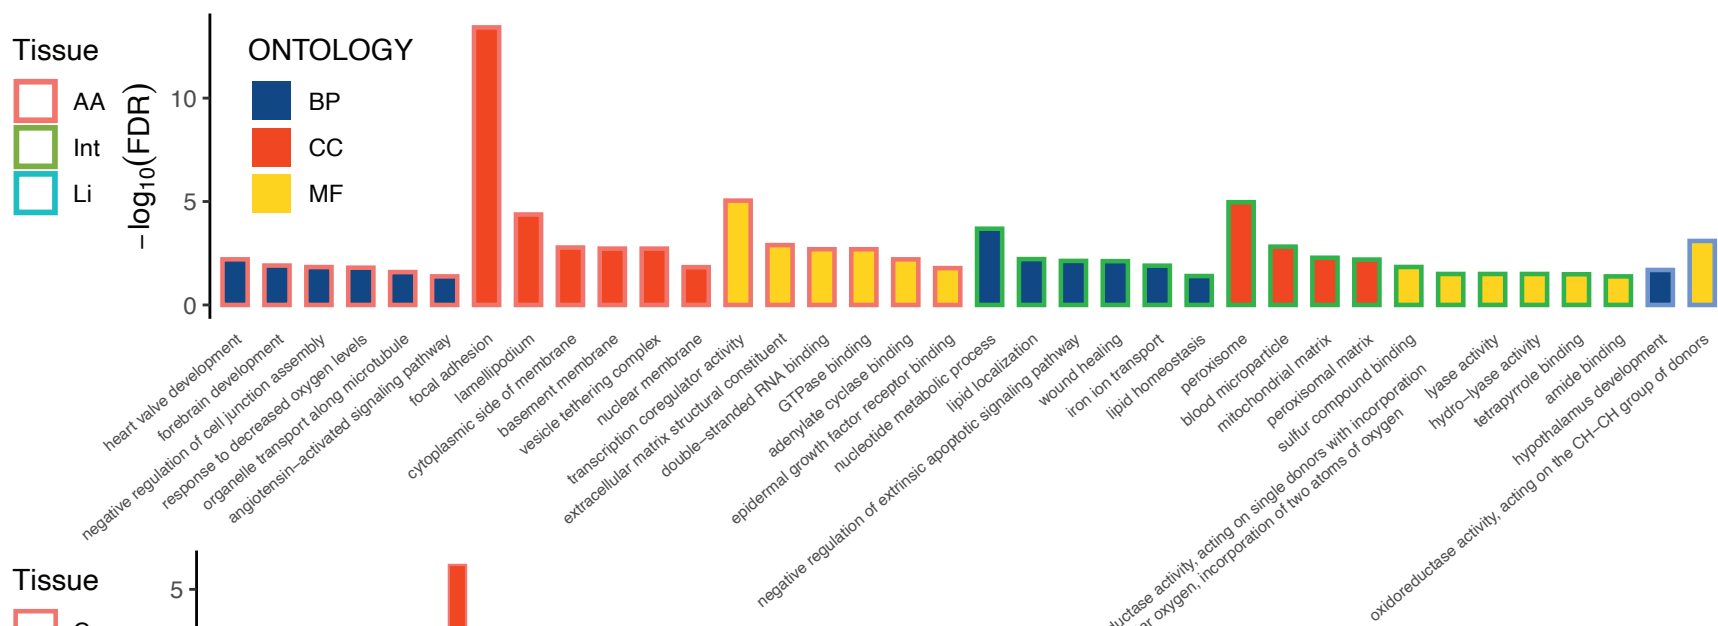**d**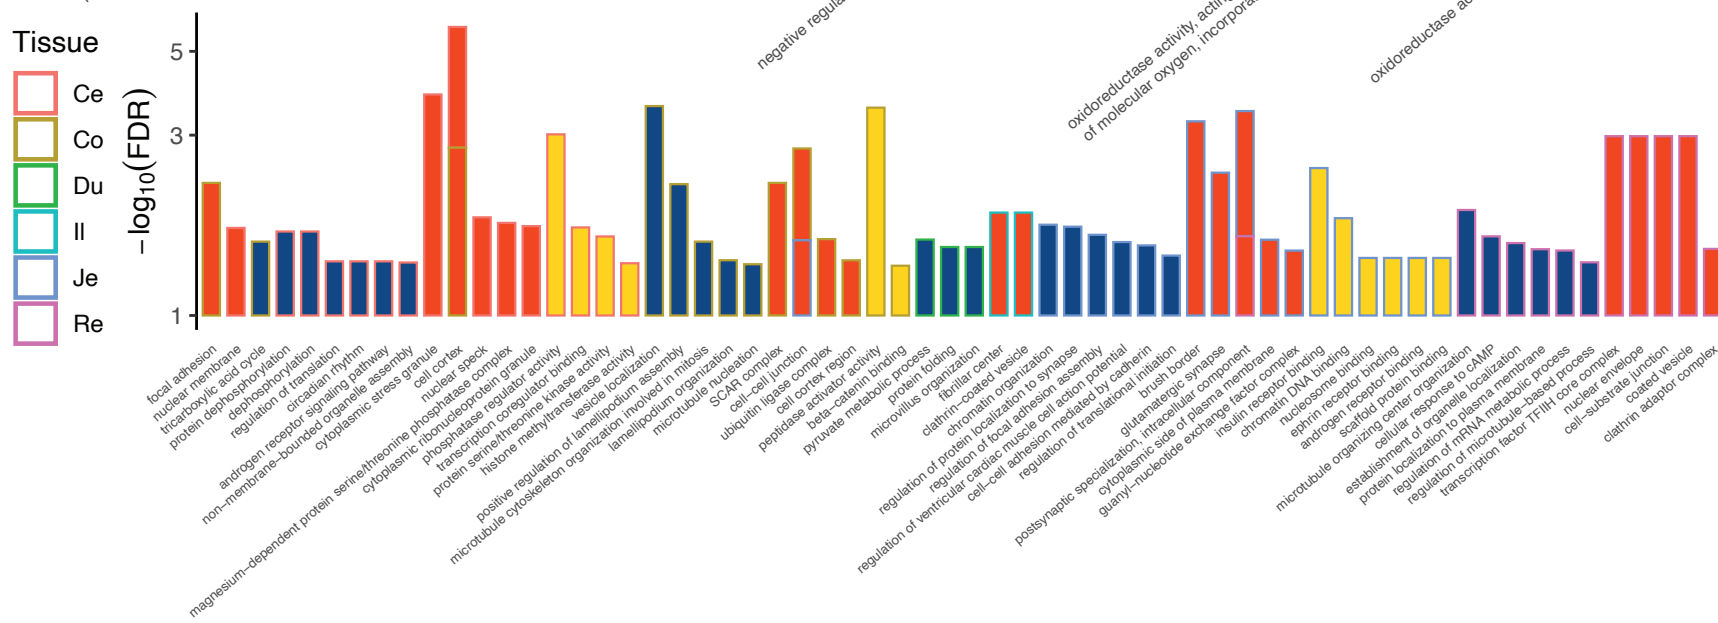

Supplement: s1 [file s1]

**a**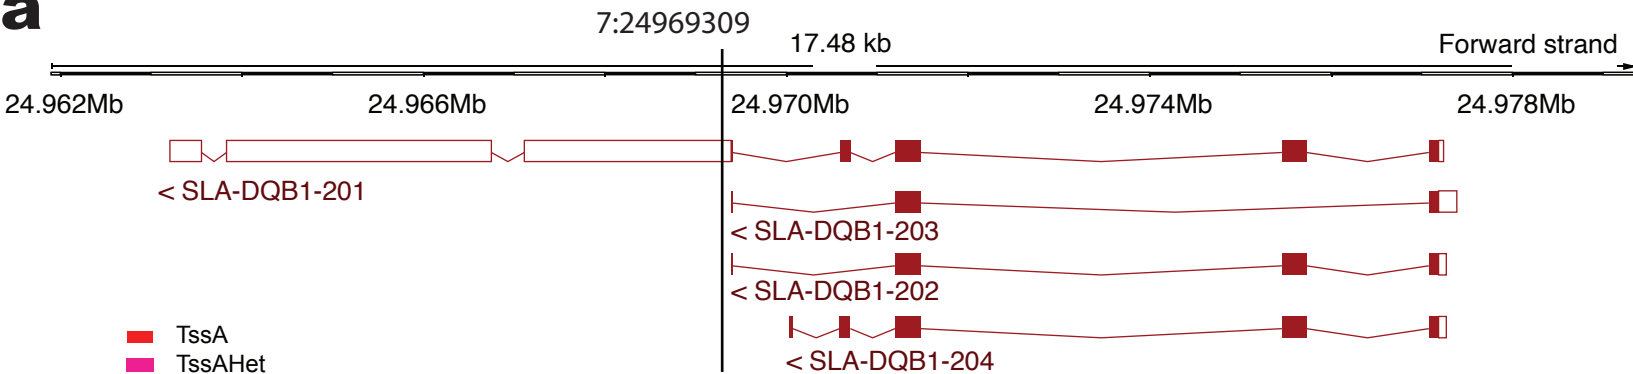**b**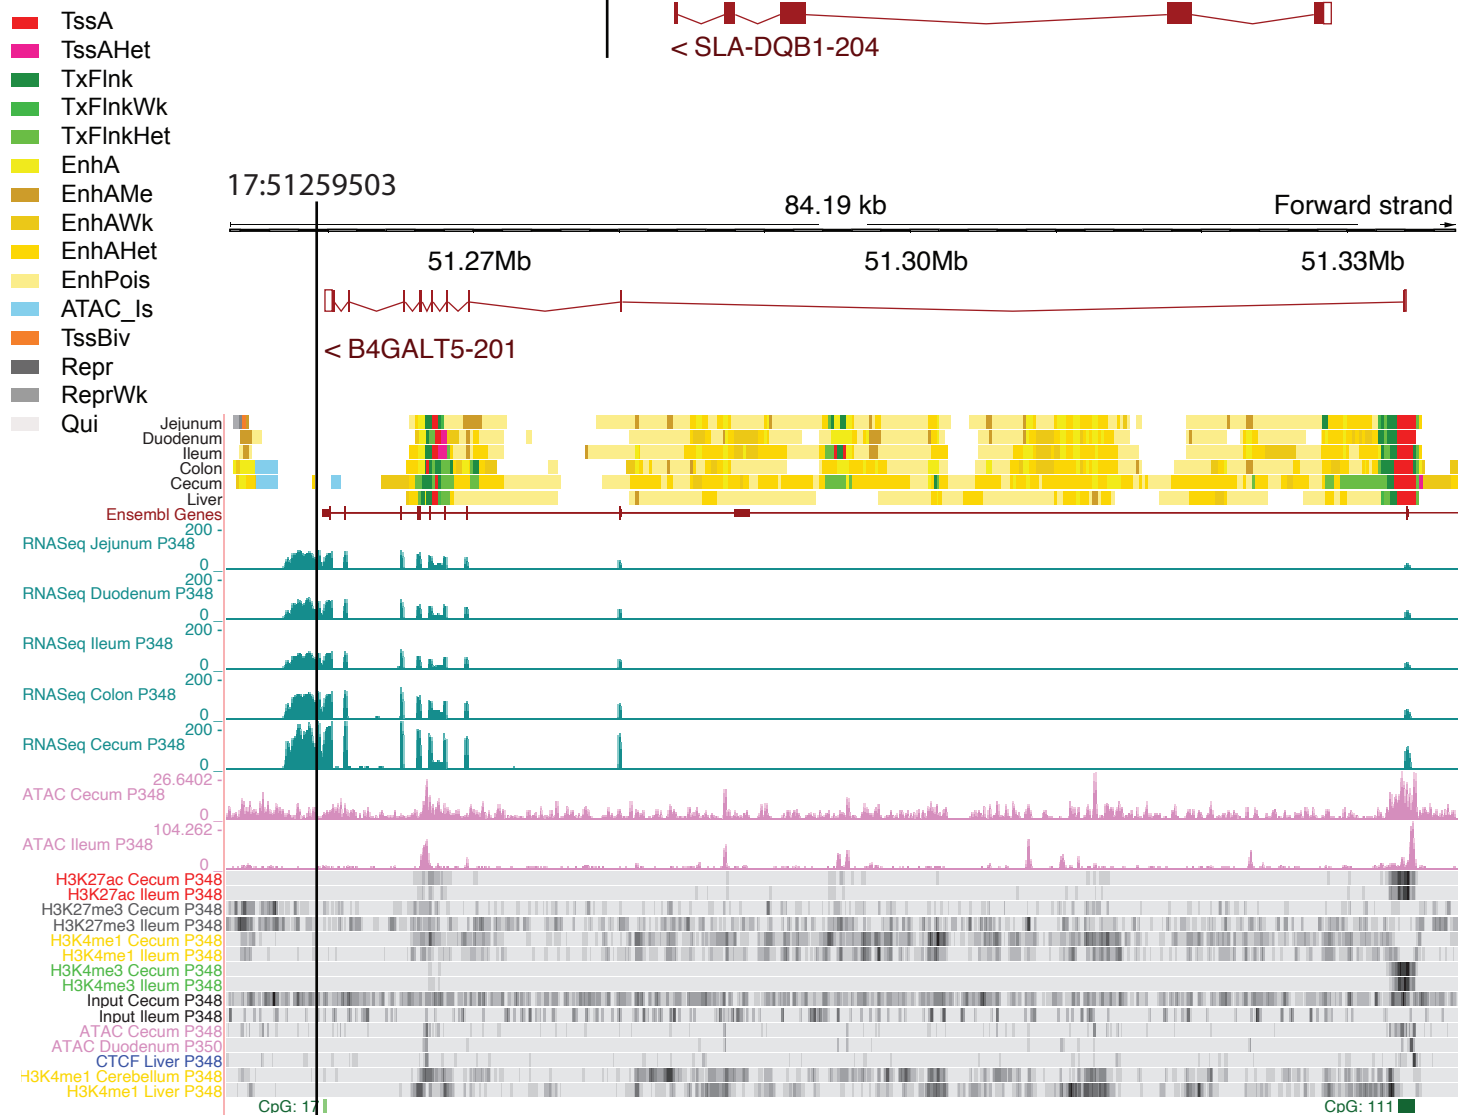

Supplement: s1 [file s1]

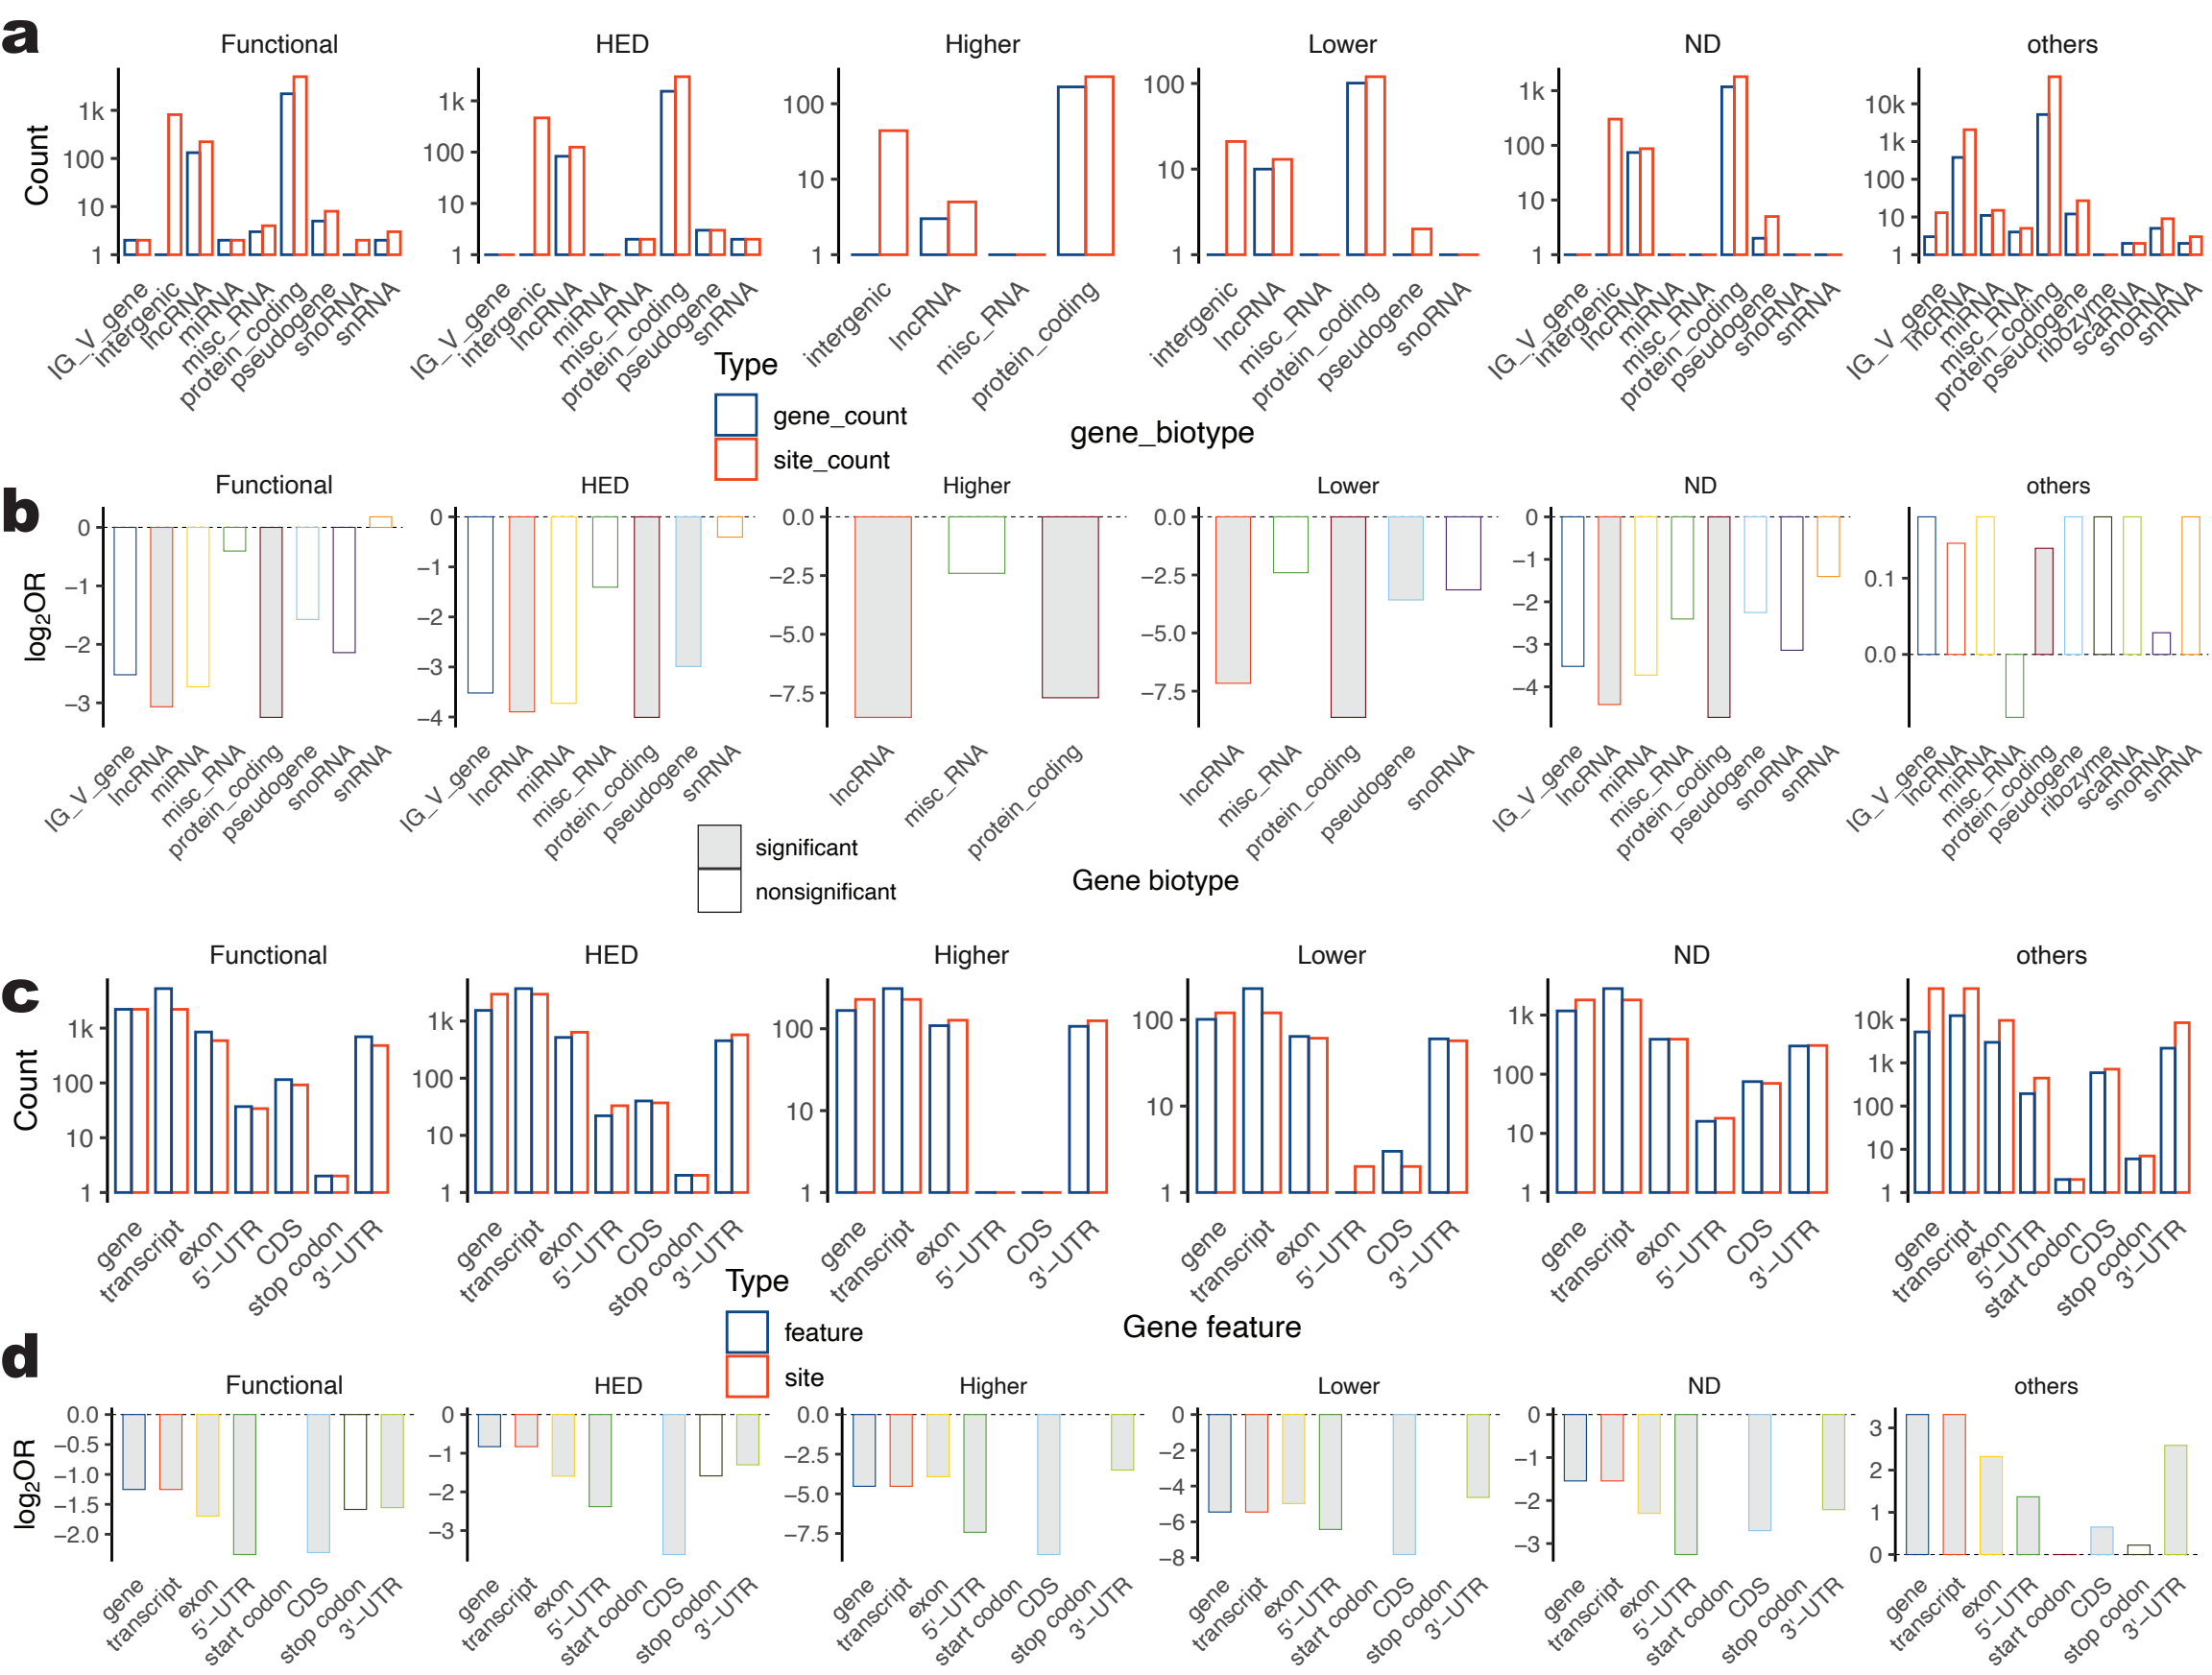

Supplement: s1 [file s1]

**a**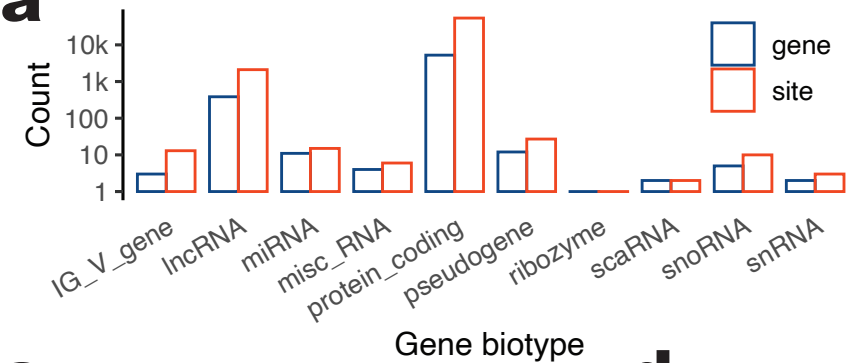**b**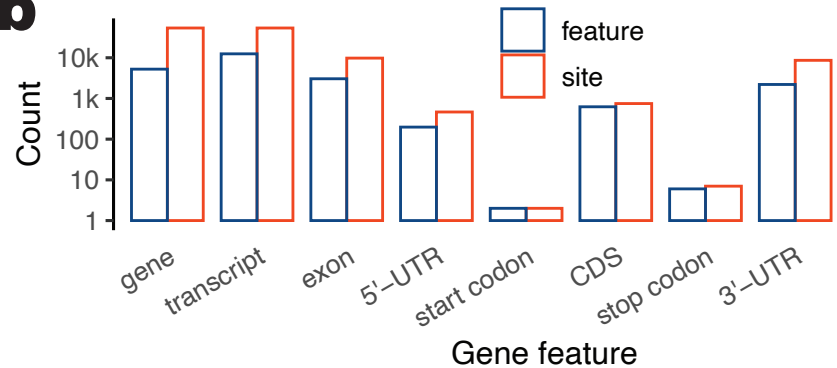**c**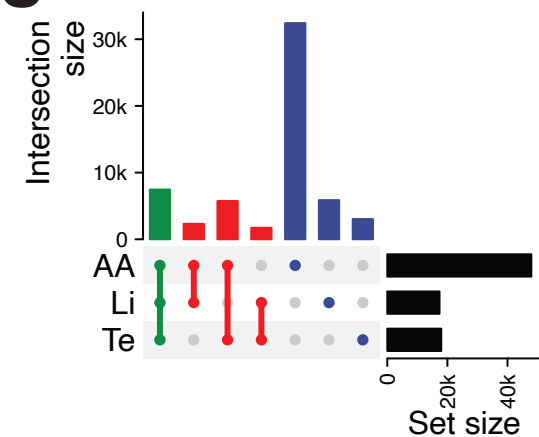**d**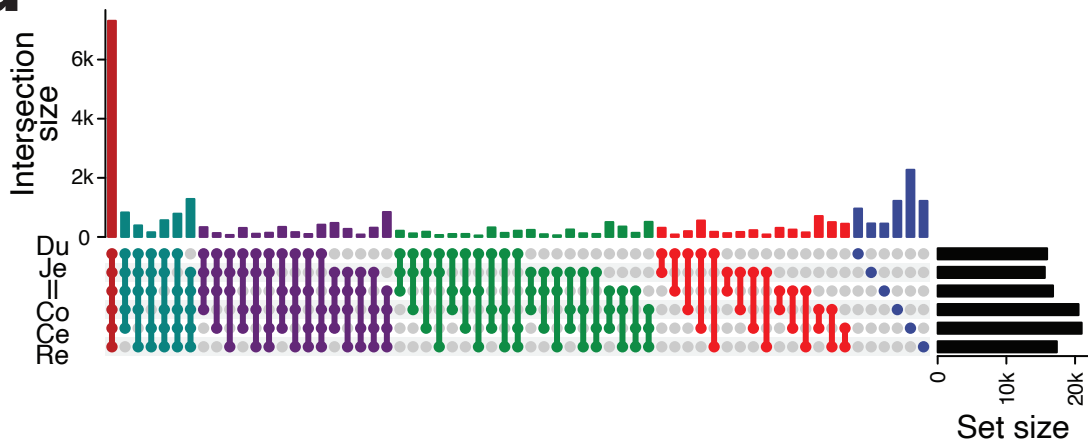

Supplement: s1 [file s1]

**a**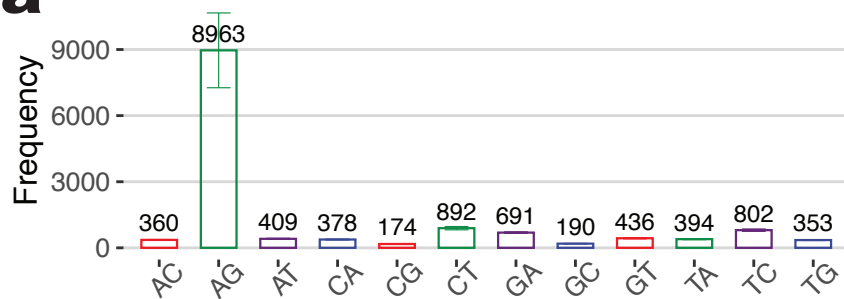**b**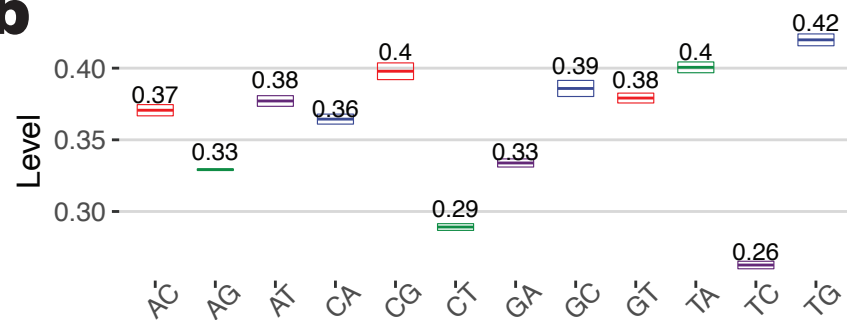**c**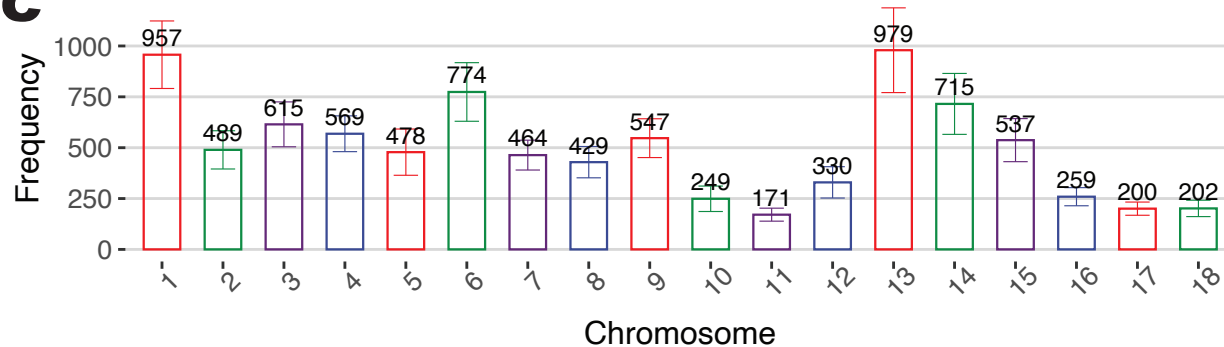**d**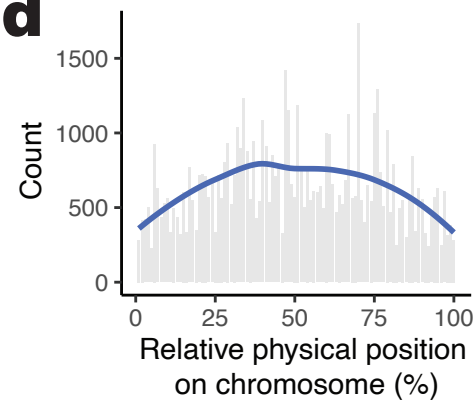**e**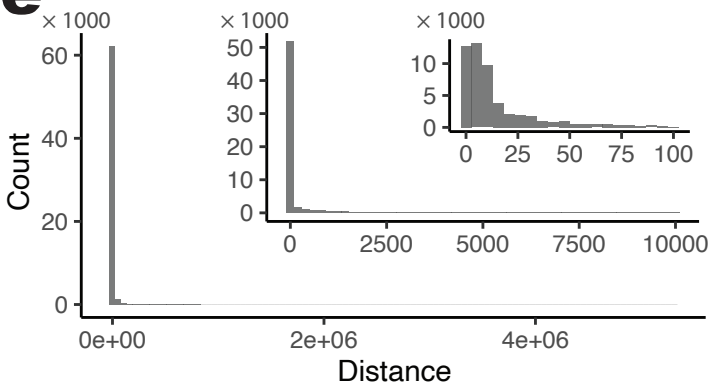**f**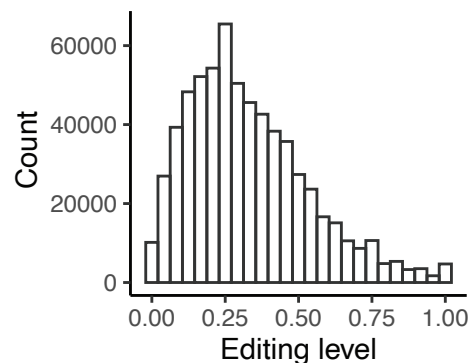**g**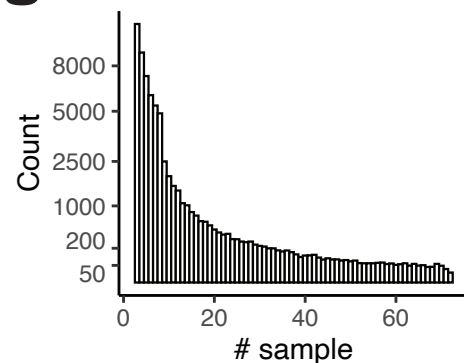

Supplement: s1 [file s1]
